# Supplementary material
Source: Springer Nature journal article supplement (https://www.springermedizin.de/resource/supplementary/12885_2012_3920_MOESM8_ESM.pdf/9464782)
Supplement: MOESM8 [file 9464782]

**A**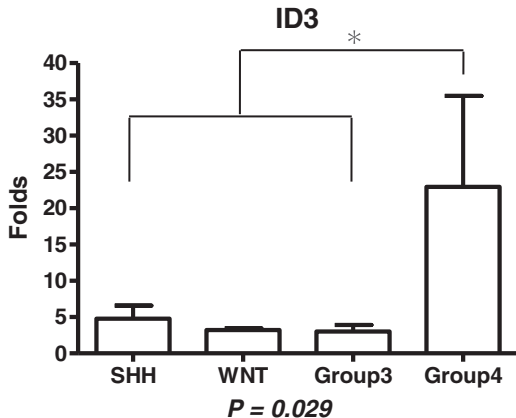**B**

|         | Age at diagnosis<br>< 3 yrs | Seeding at<br>presentation | Anaplastic<br>histology |
|---------|-----------------------------|----------------------------|-------------------------|
| WNT     | 1/2 (50%)                   | 1/2 (50%)                  | 0/2 (0%)                |
| SHH     | 4/8 (50%)                   | 2/8 (25%)                  | 0/8 (0%)                |
| Group 3 | 0/6 (0%)                    | 3/6 (50%)                  | 3/6 (50%)               |
| Group 4 | 0/14 (0%)                   | 5/14 (36%)                 | 1/14 (7%)               |
